# Supplementary material for: Surface charge-induced electrospray for high-throughput analysis of complex samples and electrochemical reaction intermediates using mass spectrometry
Source: Royal Society of Chemistry journal article supplement (doi:10.1039/d4ay00276h), 2024-01-01
Supplement: d4ay00276h1.pdf [file d4ay00276h1.pdf]

## Electronic Supplementary Information

### **Surface Charge-Induced Electrospray for High-Throughput Analysis of Complex Samples and Electrochemical Reaction Intermediates Using Mass Spectrometry**

*Yajie Huang, Yajun Zheng, Qianqian Zuo, Zhiming Zhang, Lixuan Zhu, Yun Li, and Zhiping Zhang\**

School of Chemistry and Chemical Engineering, Xi'an Shiyou University, Xi'an 710065 (China)

E-mail: zhipingzhang@xsyu.edu.cn

## Table of Contents

|                                                                                                                                                                                                                                                                                                                                                                                                                                                            |                 |
|------------------------------------------------------------------------------------------------------------------------------------------------------------------------------------------------------------------------------------------------------------------------------------------------------------------------------------------------------------------------------------------------------------------------------------------------------------|-----------------|
| <b>Detailed Experimental Procedures</b> .....                                                                                                                                                                                                                                                                                                                                                                                                              | <b>Page S4</b>  |
| <b>Figure S1.</b> Photograph of the high-throughput SCIESI array coupled to a mass spectrometer and proposed schematic diagram of the high-throughput SCIESI array for automated operation.....                                                                                                                                                                                                                                                            | <b>Page S7</b>  |
| <b>Figure S2.</b> Influence of the different turns of Cu conductive tape wrapped around the pipette tip on SCIESI-MS for the analysis of risperidone and on the current from the resulting spray plume, and electric field profiles between SCIESI and an MS inlet as the thickness of the Cu conductive tape was 0.2 mm and 2.0 mm.....                                                                                                                   | <b>Page S7</b>  |
| <b>Figure S3.</b> Influence of the distance of Cu conductive tape to the front end of pipette tip on SCIESI-MS for the analysis of risperidone and on the current from the resulting spray plume; and electric field profiles between SCIESI and an MS inlet when the distance of Cu conductive tape to pipette tip was 0 mm and 1 mm.....                                                                                                                 | <b>Page S8</b>  |
| <b>Figure S4.</b> Comparison of the performance of the geometries of pipette tip wrapped in Cu conductive tape at its front end and pipette tip drilled with holes at a distance of 10 mm to the rear end of paper substrate and subsequently wrapped in Cu conductive tape for the analysis of risperidone, and photographic images for the preparation procedure of pipette tip drilled with holes and subsequently wrapped with Cu conductive tape..... | <b>Page S9</b>  |
| <b>Figure S5.</b> Comparison of the performance of SCIESI source (developed method) and portable paper-based ESI by contacting a metal wire with paper substrate (conventional method) for the analysis of various therapeutic drugs.....                                                                                                                                                                                                                  | <b>Page S9</b>  |
| <b>Figure S6.</b> Correlation between the applied voltage on Cu conductive tape and the measured voltage on paper substrate.....                                                                                                                                                                                                                                                                                                                           | <b>Page S10</b> |
| <b>Figure S7.</b> Comparison of the performance of SCIESI source (developed method) and portable paper-based ESI by contacting a metal wire with paper substrate (conventional method) for the analysis of 1 $\mu\text{g mL}^{-1}$ risperidone in serum using different paper substrates.....                                                                                                                                                              | <b>Page S10</b> |
| <b>Figure S8.</b> Ion chronograms for four spray events of amitriptyline, clozapine, amisulpride, quetiapine, risperidone, and aripiprazole in serum.....                                                                                                                                                                                                                                                                                                  | <b>Page S11</b> |
| <b>Figure S9.</b> Single spray ion chronograms of amitriptyline, clozapine, amisulpride, quetiapine, risperidone, and aripiprazole in serum.....                                                                                                                                                                                                                                                                                                           | <b>Page S12</b> |
| <b>Figure S10.</b> MS/MS spectra of the reactant (m/z 122), intermediate (m/z 121), and products (m/z 241, m/z 240, and m/z 226) involved in the oxidation reaction of N,N-dimethylaniline to its dimer N,N,N',N'-tetramethylbenzidine.....                                                                                                                                                                                                                | <b>Page S12</b> |
| <b>Figure S11.</b> Extracted ion chronograms (EIC) of the reactant (m/z 122), intermediate                                                                                                                                                                                                                                                                                                                                                                 |                 |

|                                                                                                                                                                                                                                                                                                                                                               |                 |
|---------------------------------------------------------------------------------------------------------------------------------------------------------------------------------------------------------------------------------------------------------------------------------------------------------------------------------------------------------------|-----------------|
| (m/z 121) and products (m/z 241, m/z 240, and m/z 226) involved in the oxidation reaction of N,N-dimethylaniline to its dimer N,N,N',N'-tetramethylbenzidine using filter paper and CNTs-coated paper as electrodes.....                                                                                                                                      | <b>Page S13</b> |
| <b>Figure S12.</b> MS/MS spectra of the reactant (m/z 159), intermediate (m/z 191), and product (m/z 207) involved in the oxidation reaction of 2-naphthalenethiol to 2-naphthalenesulfonic acid.....                                                                                                                                                         | <b>Page S13</b> |
| <b>Figure S13.</b> Extracted ion chromatograms (EIC) of the reactant (m/z 159), intermediate (m/z 191), and product (m/z 207) involved in the oxidation reaction of 2-naphthalenethiol to 2-naphthalenesulfonic acid using filter paper and CNTs-coated paper as electrodes.....                                                                              | <b>Page S14</b> |
| <b>Figure S14.</b> Electrochemical reduction of 6-nitroquinoline (6-NQ) to 6-aminoquinoline (6-AQ) in positive mode and 4-nitrobenzoic acid (4-NA) to 4-aminobenzoic acid (4-AA) in negative mode.....                                                                                                                                                        | <b>Page S15</b> |
| <b>Figure S15.</b> Extracted ion chromatograms (EIC) of the reactant (m/z 175), intermediates (m/z 161 and m/z 159) and product (m/z 145) involved in the positive mode reduction reaction of 6-nitroquinoline (6-NQ) to 6-aminoquinoline (6-AQ) using filter paper and CNTs-coated paper as electrodes, and their corresponding MS/MS spectra.....           | <b>Page S16</b> |
| <b>Figure S16.</b> Extracted ion chromatograms (EIC) of the reactant (m/z 166), intermediates (m/z 152 and m/z 150), and product (m/z 136) involved in the reduction reaction of 4-nitrobenzoic acid (4-NA) to 4-aminobenzoic acid (4-AA) in negative mode using filter paper and CNTs-coated paper as electrodes, and their corresponding MS/MS spectra..... | <b>Page S17</b> |
| <b>Table S1.</b> Selected reaction monitoring (SRM) conditions for all therapeutic drugs and their internal standards.....                                                                                                                                                                                                                                    | <b>Page S18</b> |
| <b>Table S2.</b> Selected reaction monitoring (SRM) conditions for all pesticides.....                                                                                                                                                                                                                                                                        | <b>Page S18</b> |
| <b>Table S3.</b> Figures of merit for the quantitative analysis of therapeutic drugs in 2 $\mu$ L of different liquid samples (e.g., serum and urine) with isotope-labelled compounds as internal standards via SCIESI-MS.....                                                                                                                                | <b>Page S19</b> |
| <b>Table S4.</b> Figures of merit for the quantitative analysis of therapeutic drugs in 2 $\mu$ L of different liquid samples (e.g., serum and urine) without isotope-labelled compounds as internal standards via SCIESI-MS.....                                                                                                                             | <b>Page S20</b> |
| <b>Table S5.</b> Figures of merit for the quantitative analysis of different pesticides in 2 $\mu$ L of different liquid samples (e.g., milk and orange juice) without isotope-labelled compounds as internal standards via SCIESI-MS.....                                                                                                                    | <b>Page S21</b> |
| <b>References</b> .....                                                                                                                                                                                                                                                                                                                                       | <b>Page S22</b> |

## Detailed Experimental Procedures

**Chemicals and materials.** Serum and artificial urine were obtained from Shaanxi Lebo Biochemical Technology Co., Ltd (Xi'an, China) and Dongguan Xinheng Technology Co., Ltd (Dongguan, China), respectively. The quantitative filter paper was ordered from Hangzhou Special Paper Co. (Fuyang, China). Silica coated paper (SG81 grade, 0.27 mm thickness) was purchased from Whatman International Ltd. (Maidstone, England). The therapeutic drug standards, including amitriptyline, clozapine, amisulpride, quetiapine, risperidone, aripiprazole, D<sub>3</sub>-amitriptyline, D<sub>8</sub>-clozapine, D<sub>5</sub>-amisulpride, D<sub>8</sub>-quetiapine, D<sub>4</sub>-risperidone, D<sub>8</sub>-aripiprazole, were purchased from Sigma-Aldrich (St. Louis, MO) or Toronto Research Chemicals Inc. (Toronto, Canada). Lysozyme, myoglobin and cytochrome c were purchased from Beijing Biodee Biotechnology Co., Ltd. (Beijing, China). The pesticide standards, including alachlor, acetochlor, metolachlor, butachlor, pretilachlor, and benzeneacetamide, were ordered from Shanghai Future Industrial Limited by Share Ltd (Shanghai, China) or Shanghai Beizhuo Biological Technology Co., Ltd (Shanghai, China). Milk and orange juice samples were obtained from a local supermarket. HPLC grade acetonitrile was purchased from Beijing J&K Scientific Ltd. (Beijing, China). Pipette tips were purchased from Xi'an Jingbo Biotechnology Co., Ltd (Xi'an, China). ZnO particles with diameters of approximately 1  $\mu\text{m}$  were purchased from Shanghai Chaowei Material Technology Co., Ltd (Shanghai, China). Amino-modified multi-walled CNTs were ordered from Beijing Deke Daojin Science & Technology Co., Ltd (Beijing, China), and their lengths and diameters were in the range of 10-30  $\mu\text{m}$  and 8-30 nm, respectively. Soluble starch was purchased from Tianjin Kemiou Chemical Reagent Co. (Tianjin, China). The resin pipette tip was fabricated by three-dimensional (3D) printing (Shaanxi Jugao Additive Manufacturing Technology Development Co., Ltd., Weinan, China). The quartz pipette tip was ordered from a local glass processing company.

**Preparation of Micropipette Tips Wrapped with Cu Conductive Tape.** In a typical example, a piece of commercially available Cu conductive tape (0.05 mm in thick) with 2 mm width and 8 mm length was wrapped around the tip end of a modified micropipette tip (volume: 100  $\mu\text{L}$ ) whose front end was cut by a size of 5 mm.

**Preparation of Disposable Micropipette Tips Packed with Paper and Adsorbent.** For a typical case, a piece of commercial filter paper was first to cut into a triangle with a base of 5 mm and a height of 11 mm. The triangular paper was then inserted into a 100  $\mu\text{L}$  micropipette tip wrapped in conductive Cu tape. Then 20  $\mu\text{L}$  of the acetonitrile solution containing 250  $\text{mg mL}^{-1}$  of adsorbent such as ZnO was added from the back of the micropipette tip. After air drying for several hours, a disposable micropipette tip packed with paper and adsorbent would be available.

**Preparation of CNTs-Coated Paper Substrates.** The procedure for preparing CNTs-coated paper is similar to our recent studies.<sup>1-3</sup> Specifically, 0.1 g of commercially available CNTs were dispersed in 100 mL of deionized water containing 0.2 g of soluble starch as an adhesive agent. To obtain a uniform solution for coating, the mixed solution was sonicated for 40 min, and the resulting suspension solution was directly transferred to a Buchner funnel covered with blank filter paper with 11 cm diameter

for coating. The papers were then hung in a hood to dry for hours and were pressed between glass plates overnight for use.

**Preparation of Disposable Micropipette Tips Packed with CNTs-Coated Paper.** In a typical case, a piece of CNTs-coated paper was first cut into a triangle with a base width of 6 mm and a length of 4 cm. The triangular paper was then inserted into a 100  $\mu\text{L}$  micropipette tip wrapped with Cu conductive tape.

**Procedure for Measuring the Spray Currents of SCIESI Ionization Sources.** The spray current of the SCIESI source was determined by using acetonitrile as the spray solvent. The current was measured using an 8246B TRMS digital multimeter (Xi'an Shengli Instrument Co., Ltd., Xi'an, China). Specifically, the paper tip from the SCIESI was directed at a stainless steel sheet measuring 2 cm (width) x 3 cm (length), which was directly connected to the TRMS digital multimeter. The distance between the paper tip and the stainless steel sheet was 7 mm. After applying 20  $\mu\text{L}$  of spray solvent and 3.5 kV of DC voltage, the spray current was recorded directly.

**Procedure for Measuring the Residual Voltages on the Inner Surfaces of Pipette Tip Made of Different Materials.** The residual voltages on the inner surfaces of polypropylene, resin and quartz were measured using a Fluke 17B digital multimeter (Shanghai Shilu Instrument Co., Ltd., Shanghai, China). When the DC voltage (3.5 kV) was turned off, the multimeter probe immediately touched the corresponding internal surfaces to measure the residual voltage.

**Procedure for Imaging the Spray Plume of SCIESI.** The spray plume from the SCIESI source was imaged by using an OMT-5950A horizontal microscope (Suzhou Omnitec Optoelectronics Technology Co., Suzhou, China) coupled to a 195LM00001 HSO LCD monitor (Wuhan Hengfa Technology Co., Wuhan, China).

**Mass Spectrometric Analysis of Therapeutic Drugs in Complex Matrices.** The TSQ Quantum Access Max mass spectrometer (Thermo Fisher Scientific, San Jose, CA, USA) was used for detection. Quantitative analysis of therapeutic drugs and pesticides in complex matrices was performed using the selected reaction monitoring (SRM) mode. The corresponding MS detection parameters are listed in Table S1. Mass spectra were recorded in the positive ion mode, and the MS inlet capillary temperature was 270  $^{\circ}\text{C}$ . Identification of target compound ions was confirmed by tandem mass spectrometry (MS/MS) using collision-induced dissociation (CID), with argon gas of 99.995% purity used as the collision gas. For a typical experiment with SCIESI-MS, a DC voltage of 3.5 kV was applied to the above disposable micropipette tip containing 2  $\mu\text{L}$  of the sample after the addition of 20  $\mu\text{L}$  of spray solvent such as acetonitrile. The distance between the micropipette tip and the MS inlet was approximately 8 mm. A spray time of 30 s was used unless otherwise stated. When optimizing the various experimental parameters, the highest MS signals for each series, in the range of  $10^5$  to  $10^6$ , were taken as 100% and the others as their relative values.

**Probing Electrochemical Reactions using SCIESI-MS.** To probe the electrochemical oxidation of N,N-dimethylaniline (DMA) to its dimer N,N,N',N'-tetramethylbenzidine (TMB) in the positive mode, 100  $\mu\text{L}$  of DMA solution at a concentration of 20  $\mu\text{g mL}^{-1}$  (acetonitrile as the solvent) was loaded into the SCIESI emitter. A 4.5 kV DC voltage

was then applied to the ion source to monitor the electrochemical reaction process. For the electrochemical oxidation of 2-naphthalenethiol (2-NT) to 2-naphthalenesulfonic acid (2-NSo) in negative mode, the reactant 2-NT was dissolved in 1:1 ethanol/water containing 10 mM ammonium acetate and 0.1% ammonia, and its concentration was  $50 \mu\text{g mL}^{-1}$ . In the electrochemical reaction, a voltage of -3.5 kV was applied. For the electrochemical reduction of 6-nitroquinoline (6-NQ) to 6-aminoquinoline (6-AQ) in the positive mode,  $30 \mu\text{g mL}^{-1}$  of 6-NQ in methanol containing 0.5% acetic acid was used, and the applied spray voltage was 4.5 kV. For the electrochemical reduction of 4-nitrobenzoic acid (4-NA) to 4-aminobenzoic acid (4-AA) in negative mode,  $20 \mu\text{g mL}^{-1}$  of 6-NQ in methanol containing 0.5% acetic acid was used, and the applied spray voltage was -4.5 kV.

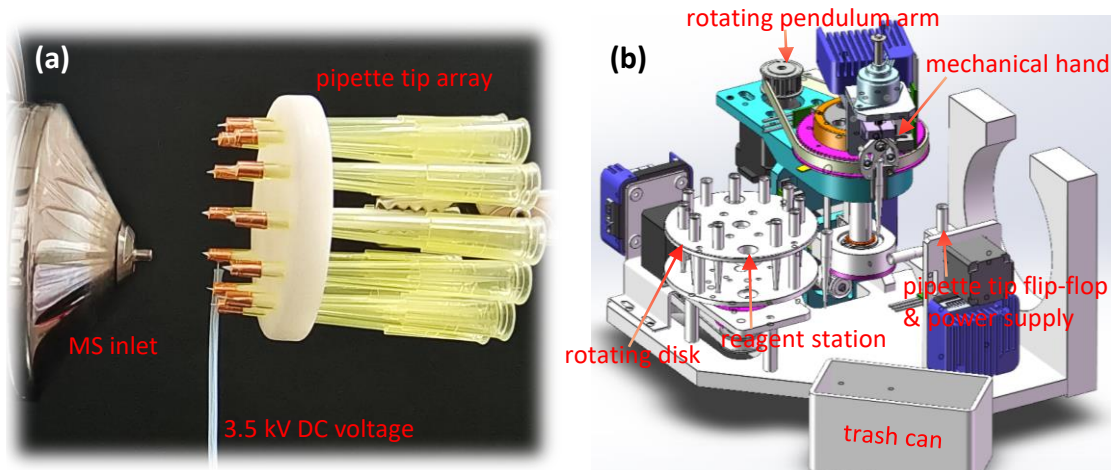

**Figure S1.** a) Photograph of the high-throughput SCIESI array coupled to a mass spectrometer; b) Proposed schematic diagram of the high-throughput SCIESI array for automated operation.

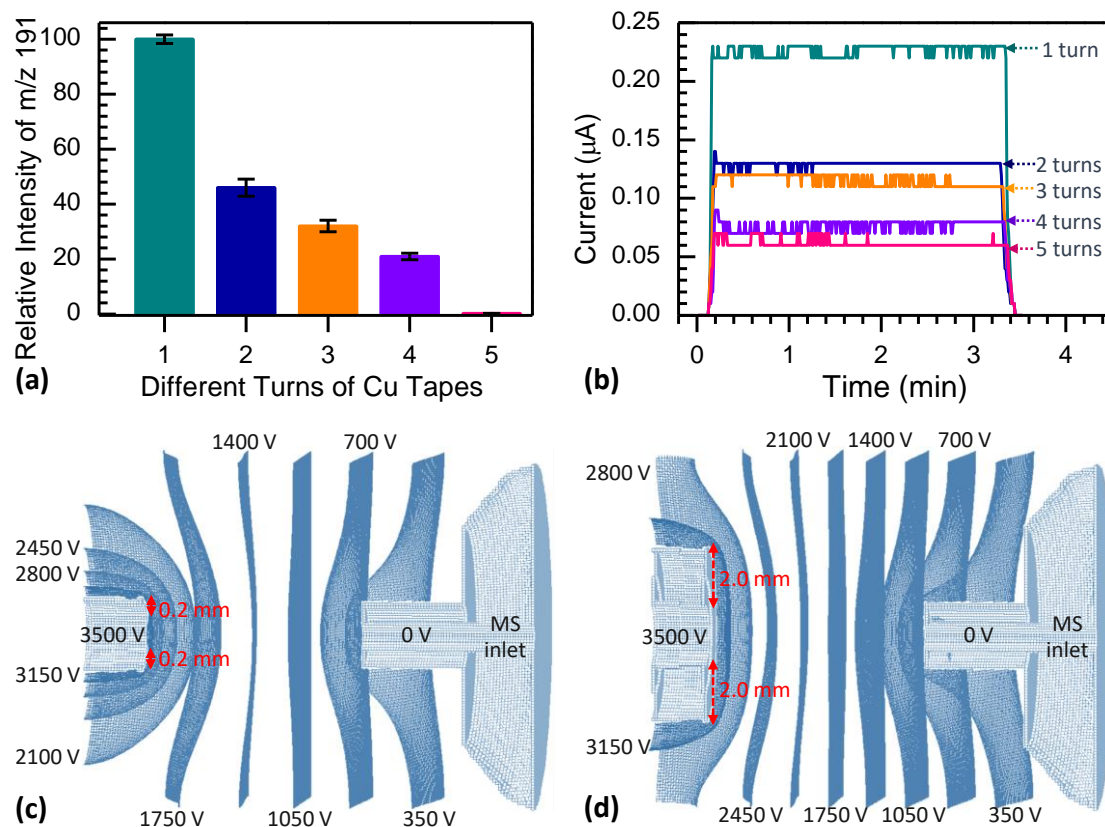

**Figure S2.** Influence of the different turns of Cu conductive tapes wrapped around the pipette tip a) on SCIESI-MS for the analysis of risperidone and b) on the current from the resulting spray plume; electric field profiles between SCIESI and an MS inlet when the thickness of the Cu conductive tape was c) 0.2 mm and d) 2.0 mm.

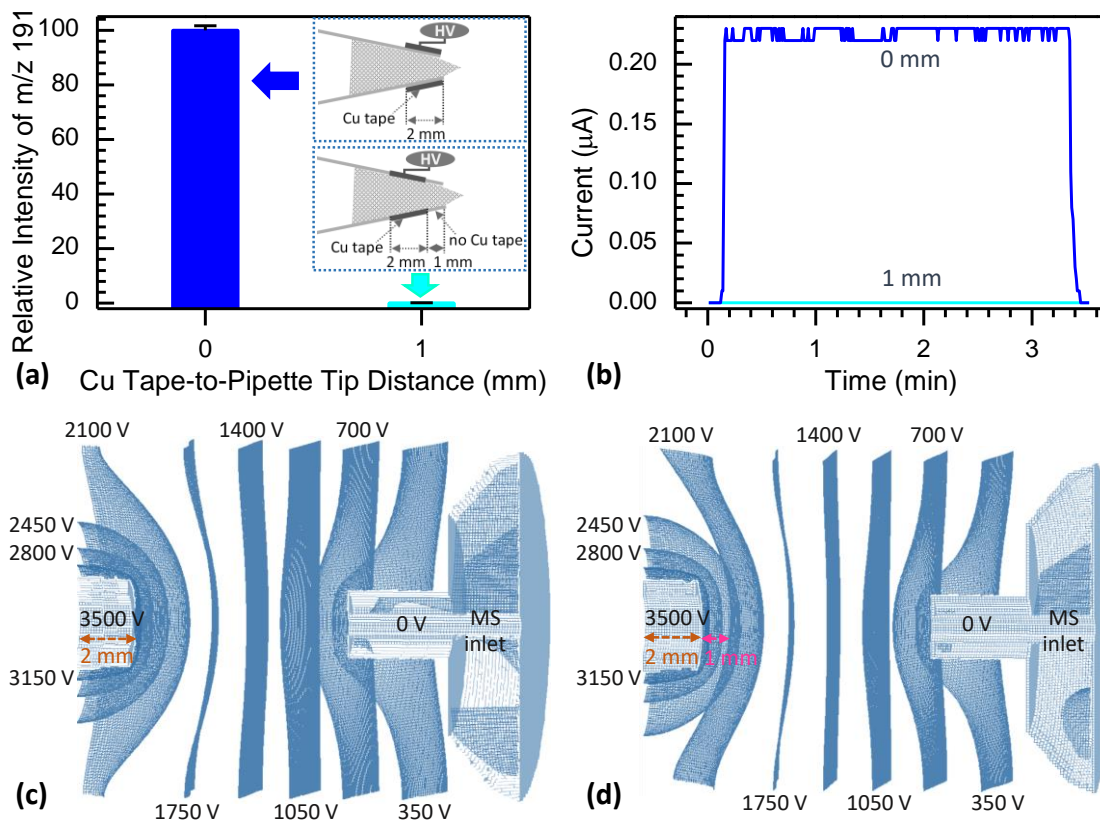

**Figure S3.** Influence of the distance of the Cu conductive tape to the front end of the pipette tip a) on the SCIESI-MS for the analysis of risperidone and b) on the current from the resulting spray plume; electric field profiles between SCIESI and an MS inlet when the distance of the Cu conductive tape to pipette tip was c) 0 mm and d) 1 mm.



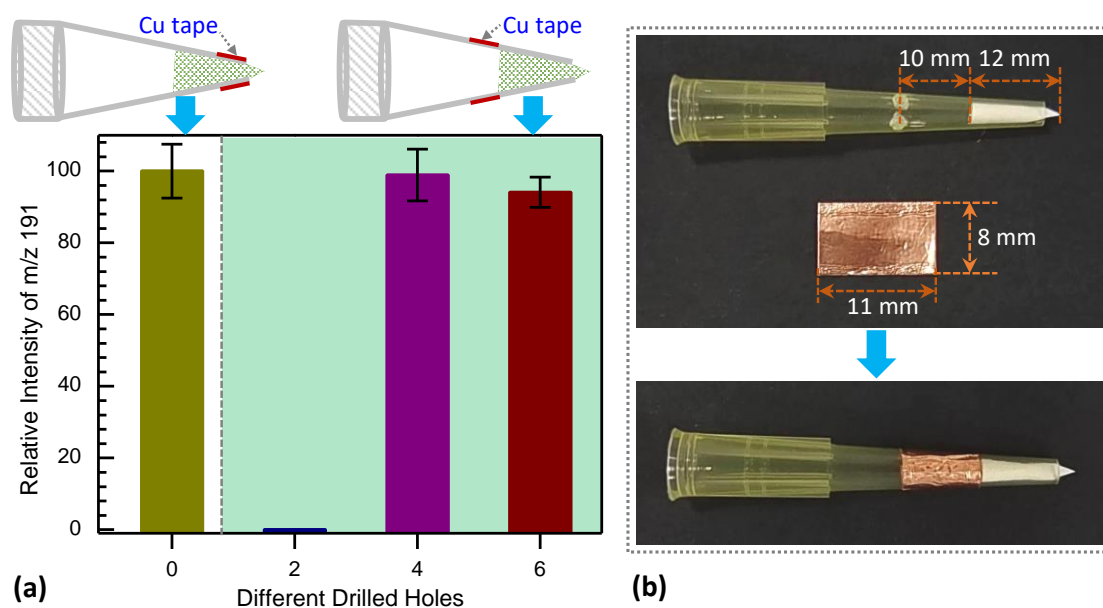

**Figure S4.** a) Comparison of the performance of the geometries of the pipette tip wrapped with Cu conductive tape at its front end and the pipette tip drilled with holes at a distance of 10 mm from the rear end of the paper substrate and subsequently wrapped with Cu conductive tape for the analysis of risperidone; b) Photographs of the preparation procedure of the pipette tip drilled with holes and subsequently wrapped with Cu conductive tape.

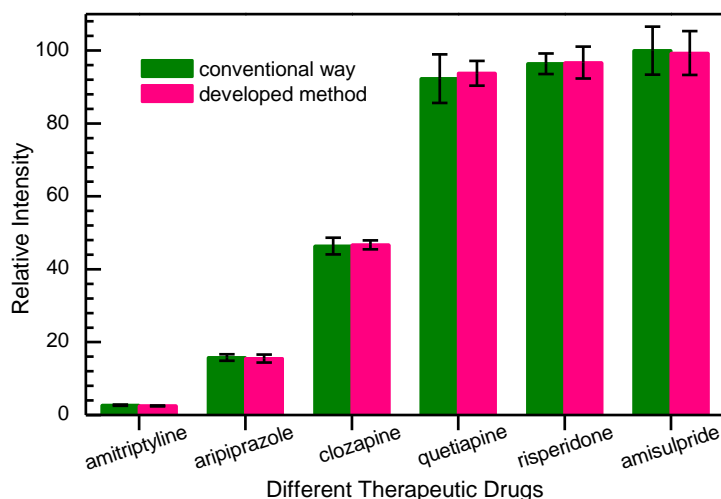

**Figure S5.** Comparison of the performance of the SCIESI source (developed way) and portable paper-based ESI by contacting a metal wire with a paper substrate (conventional method) for the analysis of various therapeutic drugs.

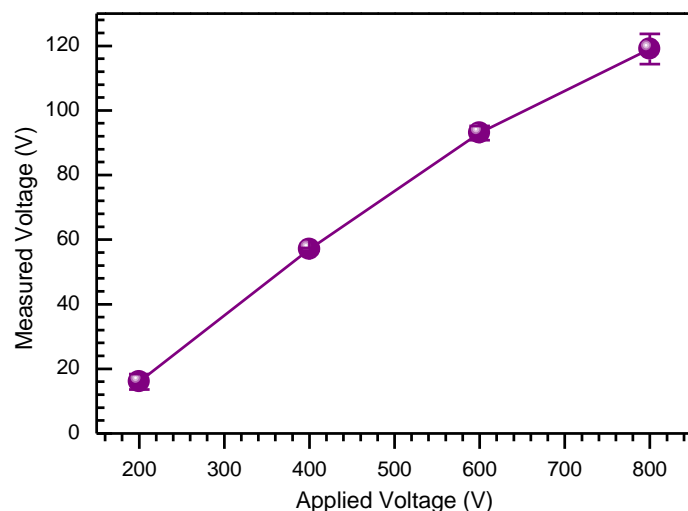

**Figure S6.** Correlation between the voltage applied to the Cu conductive tape and the voltage measured on the paper substrate (Note: To measure the voltage on the paper substrate, a metal wire was inserted into the pipette tip used and touched to the paper substrate. The corresponding voltage was then measured using a multimeter. Due to the limitations of our experimental conditions, a maximum voltage of 800 V was applied to the Cu conductive tape).

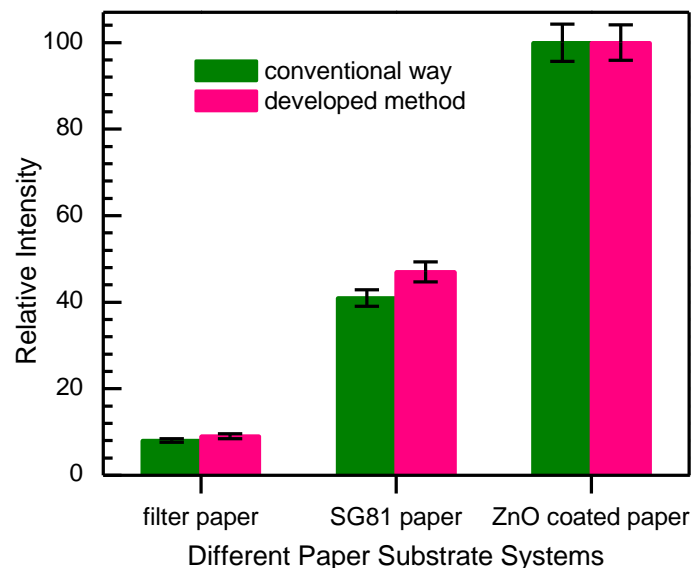

**Figure S7.** Comparison of the performance of the SCIESI source (developed way) and portable paper-based ESI by contacting a metal wire with a paper substrate (conventional method) for the analysis of  $1 \mu\text{g mL}^{-1}$  risperidone in serum using different paper substrates (sample volume:  $2 \mu\text{L}$ ; spray solvent:  $20 \mu\text{L}$  acetonitrile; applied voltage: 3.5 kV).

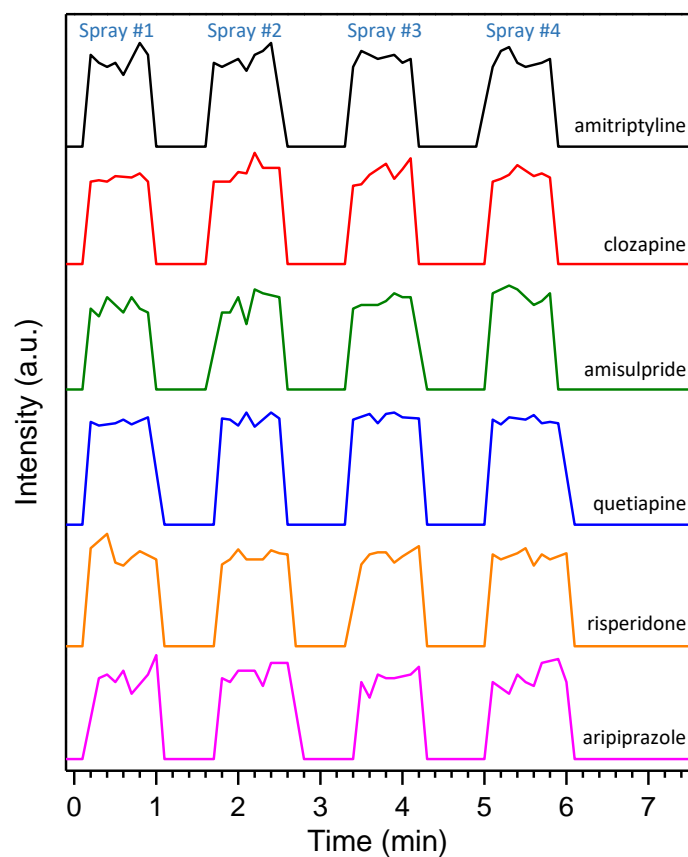

**Figure S8.** Ion chromatograms for four spray events of amitriptyline, clozapine, amisulpride, quetiapine, risperidone, and aripiprazole in serum ( $100 \text{ ng mL}^{-1}$  for each drug; sample volume:  $2 \text{ }\mu\text{L}$ ; spray solvent:  $20 \text{ }\mu\text{L}$  acetonitrile; applied voltage:  $3.5 \text{ kV}$ ).

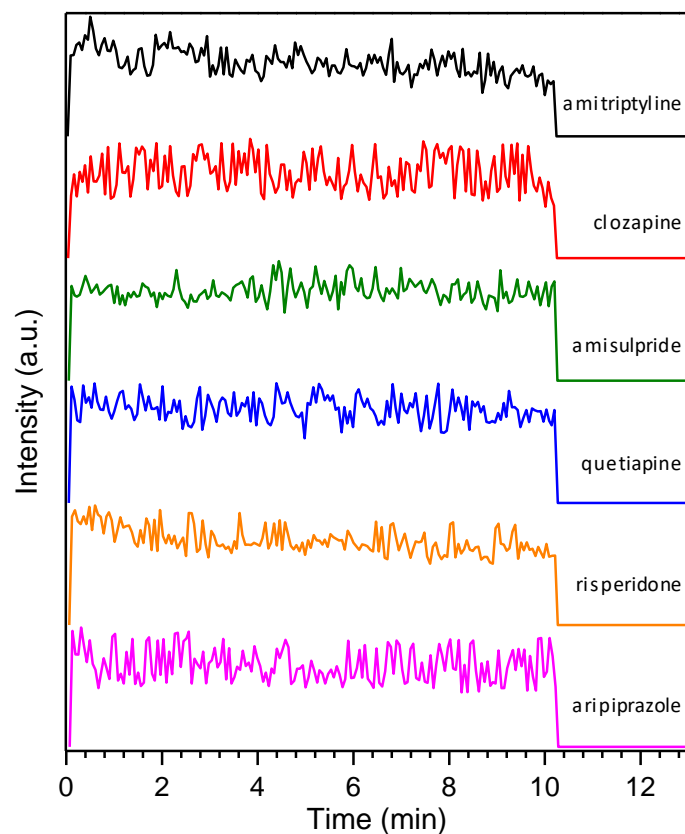

**Figure S9.** Ion chromatograms for a single spray event of amitriptyline, clozapine, amisulpride, quetiapine, risperidone, and aripiprazole in serum ( $100 \text{ ng mL}^{-1}$  for each drug; sample volume:  $2 \text{ }\mu\text{L}$ ; spray solvent:  $20 \text{ }\mu\text{L}$  acetonitrile; applied voltage:  $3.5 \text{ kV}$ ).

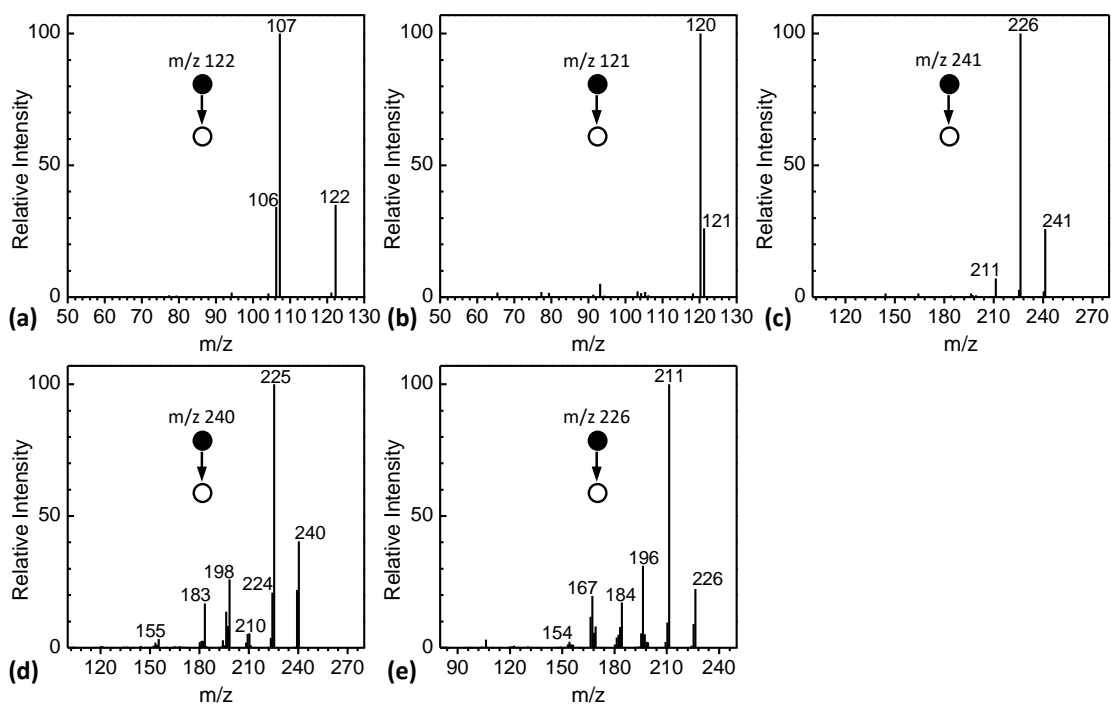

**Figure S10.** MS/MS spectra of the a) reactant ( $m/z$  122), b) intermediate ( $m/z$  121), and c-e) products ( $m/z$  241,  $m/z$  240, and  $m/z$  226) involved in the oxidation reaction of  $N,N$ -dimethylaniline to its dimer  $N,N,N',N'$ -tetramethylbenzidine.

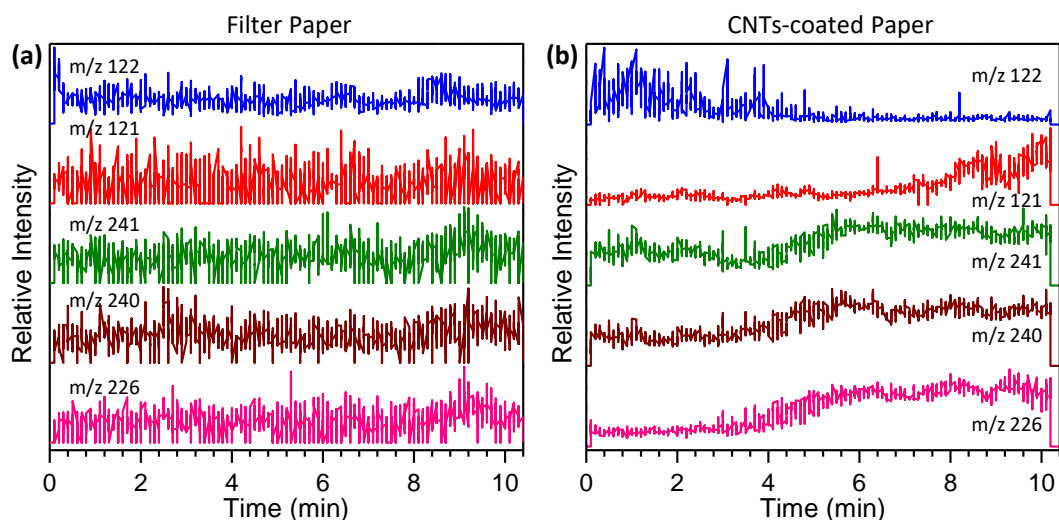

**Figure S11.** Extracted ion chromatograms (EIC) of the reactant ( $m/z$  122), intermediate ( $m/z$  121), and products ( $m/z$  241,  $m/z$  240, and  $m/z$  226) involved in the oxidation reaction of *N,N*-dimethylaniline to its dimer *N,N,N',N'*-tetramethylbenzidine using a) filter paper and b) CNTs-coated paper as electrodes.

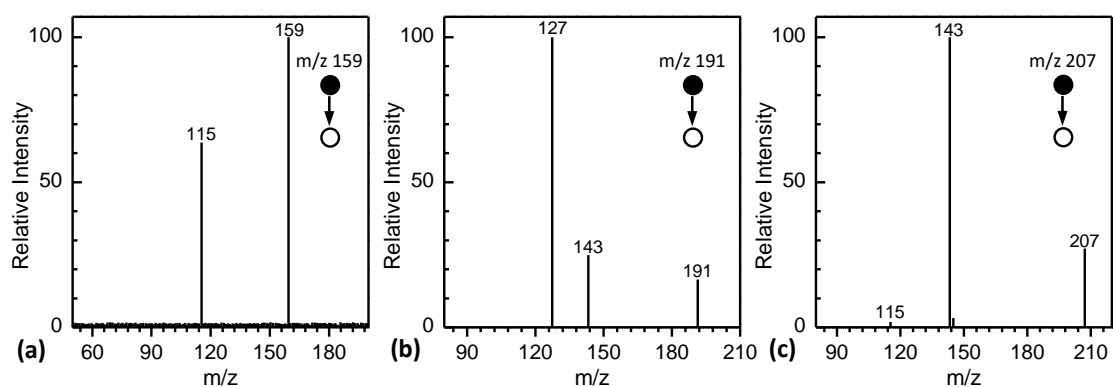

**Figure S12.** MS/MS spectra of the a) reactant ( $m/z$  159), b) intermediate ( $m/z$  191), and c-e) product ( $m/z$  207) involved in the oxidation reaction of 2-naphthalenethiol (2-NT) to 2-naphthalenesulfonic acid (2-NSo).

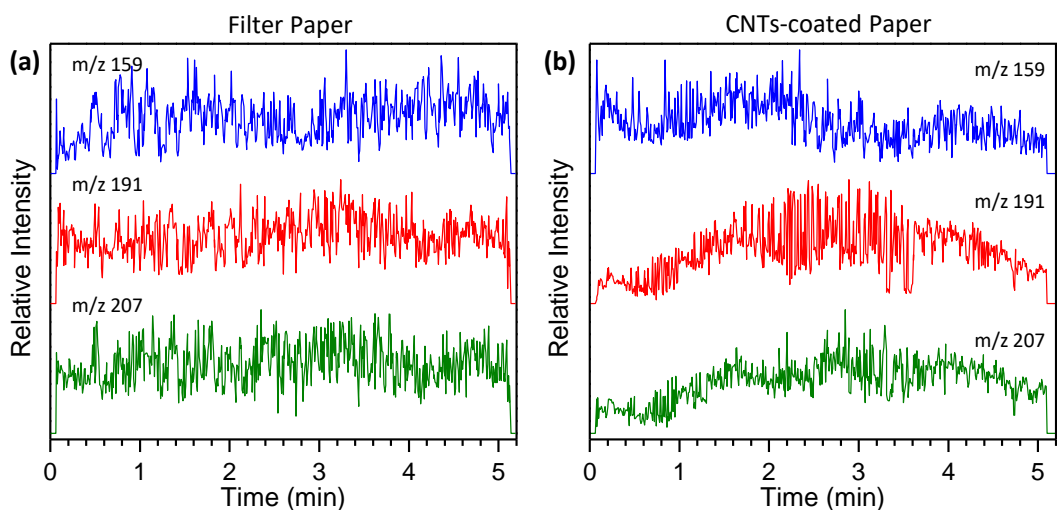

**Figure S13.** Extracted ion chromatograms (EIC) of the reactant (m/z 159), intermediate (m/z 191), and product (m/z 207) involved in the oxidation reaction of 2-naphthalenethiol (2-NT) to 2-naphthalenesulfonic acid (2-NSo) using a) filter paper and b) CNTs-coated paper as electrodes.

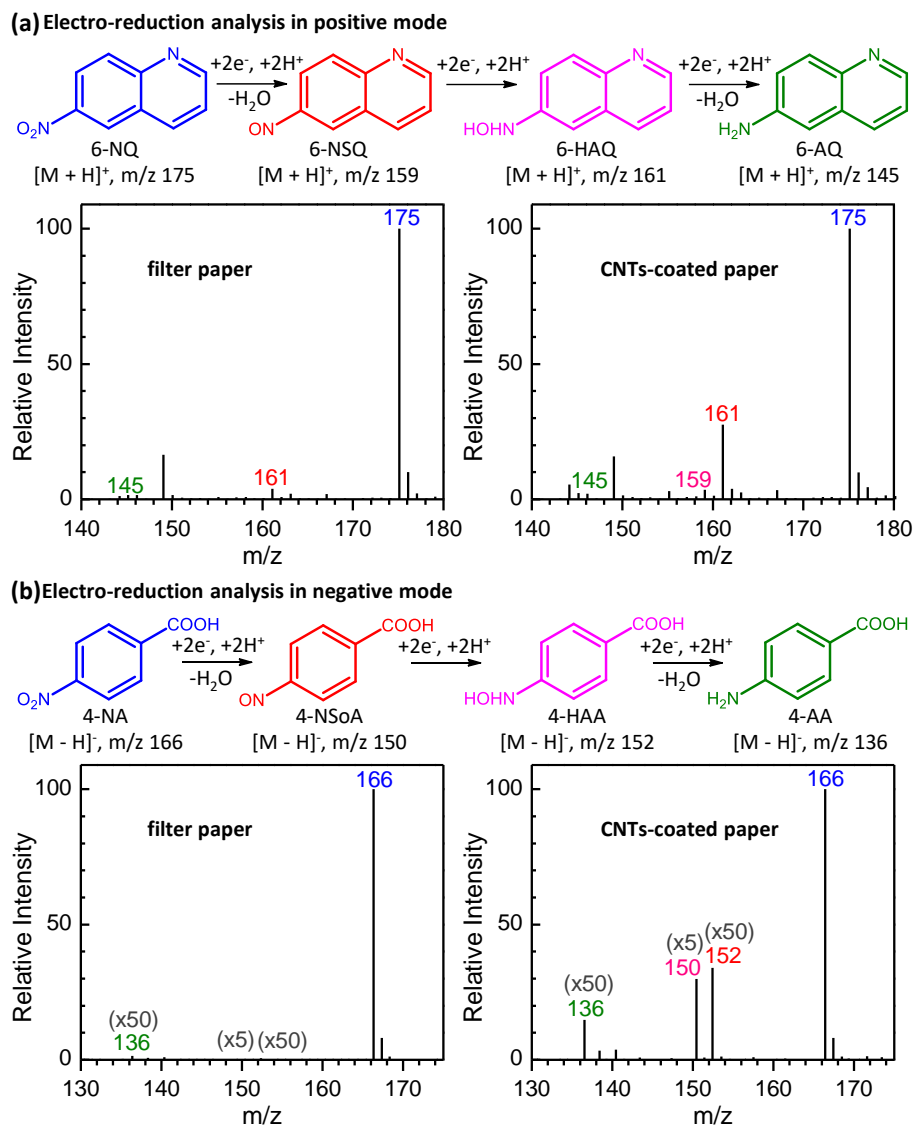

**Figure S14.** Electrochemical reduction of a) 6-nitroquinoline (6-NQ) to 6-aminoquinoline (6-AQ) in the positive mode and b) 4-nitrobenzoic acid (4-NA) to 4-aminobenzoic acid (4-AA) in the negative mode.

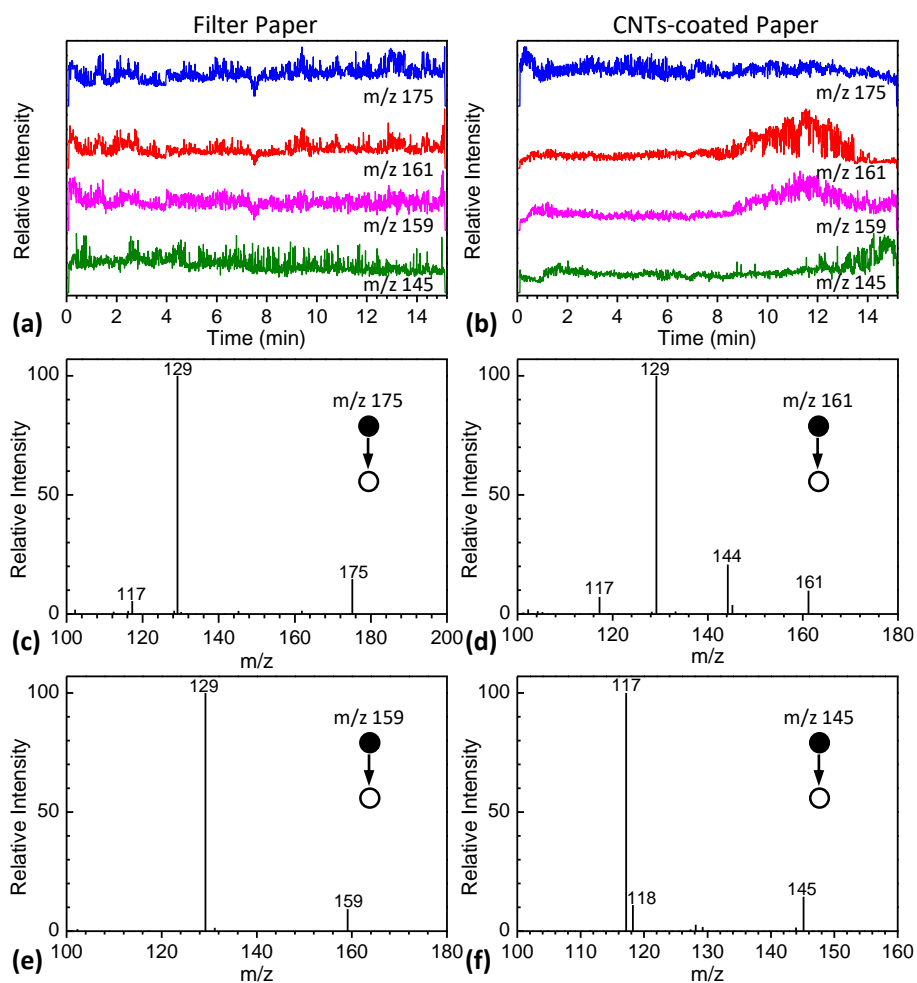

**Figure S15.** Extracted ion chromatograms (EIC) of the reactant (m/z 175), intermediates (m/z 161 and m/z 159) and product (m/z 145) involved in the reduction reaction of 6-nitroquinoline (6-NQ) to 6-aminoquinoline (6-AQ) in positive mode using a) filter paper and b) CNTs-coated paper as electrodes, and c-f) their corresponding MS/MS spectra.



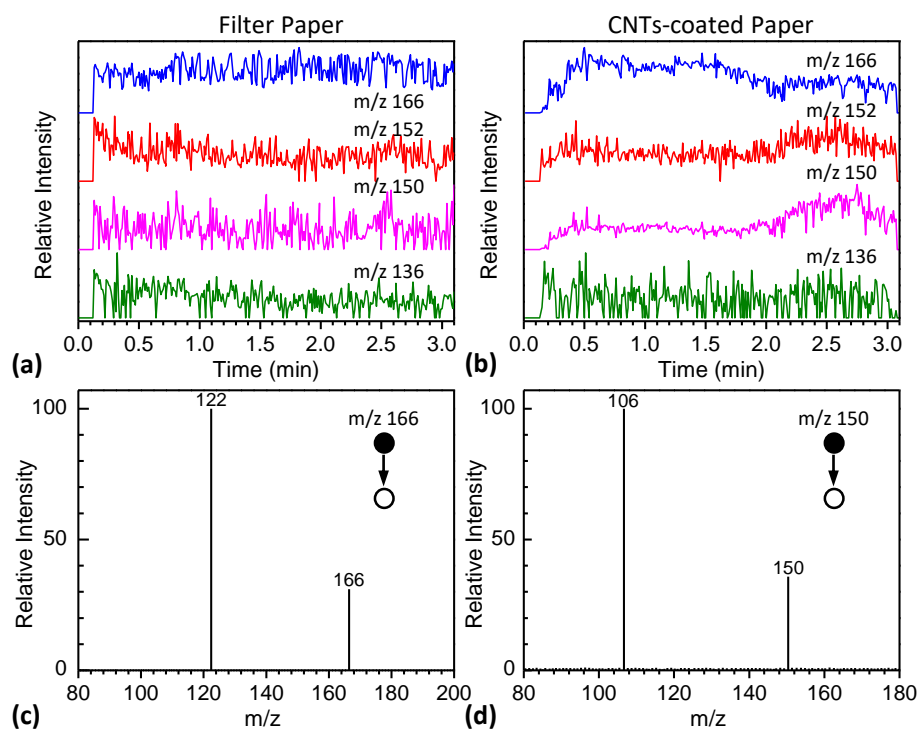

**Figure S16.** Extracted ion chromatograms (EIC) of the reactant ( $m/z$  166), intermediates ( $m/z$  152 and  $m/z$  150), and product ( $m/z$  136) involved in the reduction reaction of 4-nitrobenzoic acid (4-NA) to 4-aminobenzoic acid (4-AA) in negative mode using a) filter paper and b) CNTs-coated paper as electrodes, and c-d) their corresponding MS/MS spectra (note: MS/MS spectra of  $m/z$  152 and  $m/z$  136 were not performed due to low peak intensity).

**Table S1.** Selected reaction monitoring (SRM) conditions for all therapeutic drugs and their internal standards

| Analyte                       | Parent Ion<br>m/z         | Fragment Ion<br>m/z | Collision Energy<br>(V) | Tube Lens<br>(V) |
|-------------------------------|---------------------------|---------------------|-------------------------|------------------|
| Amitriptyline                 | 278, [M + H] <sup>+</sup> | 84                  | 25                      | 83               |
| D <sub>3</sub> -Amitriptyline | 281, [M + H] <sup>+</sup> | 87                  | 23                      | 83               |
| Clozapine                     | 327, [M + H] <sup>+</sup> | 270                 | 21                      | 89               |
| D <sub>8</sub> -Clozapine     | 335, [M + H] <sup>+</sup> | 275                 | 21                      | 91               |
| Amisulpride                   | 370, [M + H] <sup>+</sup> | 112                 | 24                      | 95               |
| D <sub>5</sub> -Amisulpride   | 375, [M + H] <sup>+</sup> | 117                 | 25                      | 96               |
| Quetiapine                    | 384, [M + H] <sup>+</sup> | 253                 | 21                      | 97               |
| D <sub>8</sub> -Quetiapine    | 392, [M + H] <sup>+</sup> | 258                 | 23                      | 98               |
| Risperidone                   | 411, [M + H] <sup>+</sup> | 191                 | 26                      | 90               |
| D <sub>4</sub> -Risperidone   | 415, [M + H] <sup>+</sup> | 195                 | 26                      | 91               |
| Aripiprazole                  | 448, [M + H] <sup>+</sup> | 285                 | 25                      | 109              |
| D <sub>8</sub> -Aripiprazole  | 456, [M + H] <sup>+</sup> | 293                 | 25                      | 106              |

**Table S2.** Selected reaction monitoring (SRM) conditions for all pesticides

| Analyte        | Parent Ion<br>m/z         | Fragment Ion<br>m/z | Collision Energy<br>(V) | Tube Lens<br>(V) |
|----------------|---------------------------|---------------------|-------------------------|------------------|
| Alachlor       | 270, [M + H] <sup>+</sup> | 162                 | 20                      | 70               |
| Acetochlor     | 270, [M + H] <sup>+</sup> | 133                 | 30                      | 70               |
| Metolachlor    | 312, [M + H] <sup>+</sup> | 252                 | 15                      | 91               |
| Butachlor      | 312, [M + H] <sup>+</sup> | 162                 | 20                      | 91               |
| S-Metolachlor  | 284, [M + H] <sup>+</sup> | 252                 | 13                      | 60               |
| Benzeacetamide | 239, [M + H] <sup>+</sup> | 163                 | 15                      | 86               |

**Table S3.** Figures of merit for the quantitative analysis of therapeutic drugs in 2  $\mu\text{L}$  of different liquid samples (e.g., serum and urine) with isotope-labelled compounds as internal standards via SCIESI-MS.

| analytes      | samples | slope | intercept | R <sup>2</sup> | LOD<br>(ng mL <sup>-1</sup> ) | LOQ<br>(ng mL <sup>-1</sup> ) | linearity range<br>(ng mL <sup>-1</sup> ) |
|---------------|---------|-------|-----------|----------------|-------------------------------|-------------------------------|-------------------------------------------|
| amitriptyline | serum   | 0.042 | -0.124    | 0.9996         | 0.003                         | 0.010                         | 0.01 – 1,000                              |
|               | urine   | 0.066 | -0.126    | 0.9999         | 0.003                         | 0.010                         | 0.01 – 1,000                              |
| clozapine     | serum   | 0.037 | -0.033    | 0.9999         | 0.002                         | 0.006                         | 0.01 – 1,000                              |
|               | urine   | 0.036 | -0.074    | 0.9999         | 0.004                         | 0.012                         | 0.01 – 1,000                              |
| amisulpride   | serum   | 0.049 | 0.148     | 0.9999         | 0.003                         | 0.009                         | 0.01 – 1,000                              |
|               | urine   | 0.100 | -0.078    | 0.9999         | 0.003                         | 0.011                         | 0.01 – 1,000                              |
| quetiapine    | serum   | 0.112 | 0.128     | 1.0000         | 0.002                         | 0.006                         | 0.01 – 1,000                              |
|               | urine   | 0.284 | -0.062    | 1.0000         | 0.002                         | 0.007                         | 0.01 – 1,000                              |
| risperidone   | serum   | 0.452 | 1.626     | 0.9997         | 0.003                         | 0.009                         | 0.01 – 1,000                              |
|               | urine   | 0.157 | 0.487     | 0.9998         | 0.003                         | 0.011                         | 0.01 – 1,000                              |
| aripiprazole  | serum   | 0.029 | -0.049    | 0.9999         | 0.002                         | 0.008                         | 0.01 – 1,000                              |
|               | urine   | 0.050 | 0.147     | 0.9999         | 0.003                         | 0.011                         | 0.01 – 1,000                              |

*Note:* The LOD and LOQ values were calculated according to the  $3\sigma/s$  and  $10\sigma/s$ , in which  $\sigma$  is the standard deviation of the blank ( $n = 4$ ), and  $s$  is the slope of related calibration curves.

**Table S4.** Figures of merit for the quantitative analysis of therapeutic drugs in 2  $\mu\text{L}$  of different liquid samples (e.g., serum and urine) without isotope-labelled compounds as internal standards via SCIESI-MS.

| analytes      | samples | slope | intercept | R <sup>2</sup> | LOD<br>(ng mL <sup>-1</sup> ) | LOQ<br>(ng mL <sup>-1</sup> ) | linearity range<br>(ng mL <sup>-1</sup> ) |
|---------------|---------|-------|-----------|----------------|-------------------------------|-------------------------------|-------------------------------------------|
| amitriptyline | serum   | 59.3  | 237.3     | 0.9998         | 0.004                         | 0.013                         | 0.01 – 1,000                              |
|               | urine   | 32.9  | -80.6     | 0.9998         | 0.002                         | 0.008                         | 0.01 – 1,000                              |
| clozapine     | serum   | 77.1  | 299.7     | 0.9998         | 0.002                         | 0.007                         | 0.01 – 1,000                              |
|               | urine   | 48.0  | 147.1     | 0.9999         | 0.003                         | 0.009                         | 0.01 – 1,000                              |
| amisulpride   | serum   | 149.2 | 464.0     | 0.9999         | 0.003                         | 0.010                         | 0.01 – 1,000                              |
|               | urine   | 210.5 | -663.4    | 0.9998         | 0.002                         | 0.007                         | 0.01 – 1,000                              |
| quetiapine    | serum   | 504.9 | 1360.9    | 0.9999         | 0.003                         | 0.009                         | 0.01 – 1,000                              |
|               | urine   | 167.6 | 627.8     | 0.9997         | 0.003                         | 0.011                         | 0.01 – 1,000                              |
| risperidone   | serum   | 584.8 | 1747.6    | 0.9998         | 0.003                         | 0.010                         | 0.01 – 1,000                              |
|               | urine   | 136.0 | -433.2    | 0.9998         | 0.004                         | 0.013                         | 0.01 – 1,000                              |
| aripiprazole  | serum   | 78.2  | 233.1     | 0.9998         | 0.003                         | 0.009                         | 0.01 – 1,000                              |
|               | urine   | 52.1  | 158.1     | 0.9999         | 0.002                         | 0.008                         | 0.01 – 1,000                              |

*Note:* The LOD and LOQ values were calculated according to the  $3\sigma/s$  and  $10\sigma/s$ , in which  $\sigma$  is the standard deviation of the blank ( $n = 4$ ), and  $s$  is the slope of related calibration curves.

**Table S5.** Figures of merit for the quantitative analysis of different pesticides in 2  $\mu\text{L}$  of different liquid samples (e.g., milk and orange juice) without isotope-labelled compounds as internal standards via SCIESI-MS.

| analytes       | samples      | slope  | intercept | R <sup>2</sup> | LOD<br>(ng mL <sup>-1</sup> ) | LOQ<br>(ng mL <sup>-1</sup> ) | linearity range<br>(ng mL <sup>-1</sup> ) |
|----------------|--------------|--------|-----------|----------------|-------------------------------|-------------------------------|-------------------------------------------|
| Alachlor       | milk         | 53.22  | 207.94    | 0.9998         | 0.003                         | 0.012                         | 0.01-1000                                 |
|                | orange juice | 70.01  | 306.49    | 0.9998         | 0.002                         | 0.008                         | 0.01-1000                                 |
| Acetochlor     | milk         | 80.56  | 324.61    | 0.9998         | 0.003                         | 0.009                         | 0.01-1000                                 |
|                | orange juice | 199.56 | -180.76   | 0.9999         | 0.002                         | 0.007                         | 0.01-1000                                 |
| Metolachlor    | milk         | 239.85 | -263.00   | 0.9999         | 0.003                         | 0.011                         | 0.01-1000                                 |
|                | orange juice | 277.60 | 689.45    | 0.9998         | 0.002                         | 0.006                         | 0.01-1000                                 |
| Butachlor      | milk         | 53.41  | 223.98    | 0.9998         | 0.003                         | 0.011                         | 0.01-1000                                 |
|                | orange juice | 279.22 | 1143.80   | 0.9997         | 0.002                         | 0.007                         | 0.01-1000                                 |
| S-Metolachlor  | milk         | 172.37 | 594.34    | 0.9998         | 0.003                         | 0.013                         | 0.01-1000                                 |
|                | orange juice | 168.53 | 664.78    | 0.9998         | 0.002                         | 0.007                         | 0.01-1000                                 |
| Benzeacetamide | milk         | 83.34  | 161.17    | 0.9999         | 0.004                         | 0.014                         | 0.01-1000                                 |
|                | orange juice | 215.63 | -292.86   | 0.9999         | 0.003                         | 0.010                         | 0.01-1000                                 |

*Note:* The LOD and LOQ values were calculated according to the  $3\sigma/s$  and  $10\sigma/s$ , in which  $\sigma$  is the standard deviation of the blank ( $n = 4$ ), and  $s$  is the slope of related calibration curves.

## References

- (1) Wang, Q.; Zheng, Y.; Zhang, X.; Han, X.; Wang, T.; Zhang, Z., A Silica Coated Paper Substrate: Development and Its Application in Paper Spray Mass Spectrometry for Rapid Analysis of Pesticides in Milk. *Analyst* **2015**, *140* (23), 8048 - 8056.
- (2) Zheng, Y.; Zhang, X.; Yang, H.; Liu, X.; Zhang, X.; Wang, Q.; Zhang, Z., Facile Preparation of Paper Substrates Coated with Different Materials and Their Applications in Paper Spray Mass Spectrometry. *Anal. Methods* **2015**, *7* (13), 5381-5386.
- (3) Zheng, Y.; Wang, Q.; Wang, X.; Chen, Y.; Wang, X.; Zhang, X.; Bai, Z.; Han, X.; Zhang, Z., Development and Application of Zirconia Coated Paper Substrate for High Sensitivity Analysis of Therapeutic Drugs in Dried Blood Spots. *Anal. Chem.* **2016**, *88* (14), 7005-7013.
